# Supplementary material
Source: HighWire-hosted journal article supplement (http://dmd.aspetjournals.org/highwire/filestream/66252/field_highwire_adjunct_files/0/Kalgutkarfinalsupplementary.pdf)
Supplement: Kalgutkarfinalsupplementary.pdf [file Kalgutkarfinalsupplementary.pdf]

Pharmacokinetics, Metabolism and Excretion of the Anti-Diabetic Agent Ertugliflozin (PF-04971729) in Healthy Male Subjects

Zhuang Miao, Gianluca Nucci, Neeta Amin, Raman Sharma, Vincent Mascitti, Meera Tugnait, Alfin D. Vaz, Ernesto Callegari and Amit S. Kalgutkar

**Drug Metabolism and Disposition**

**I. Rat Mass Balance Summary**

**Supplementary Table 1.** Summary of mean radioactivity recovered in male and female Sprague-Dawley rats after administration of a single 25 mg/kg oral dose of [<sup>14</sup>C]-PF-04971729 (N = 3/sex)

| <b>Excretion Route<br/>(males)</b> | <b>Urine</b>     | <b>Feces</b> | <b>Total<sup>a</sup></b> |
|------------------------------------|------------------|--------------|--------------------------|
| <b>Time (h)</b>                    | <b>% of dose</b> |              |                          |
| <b>0-24</b>                        | 25.7             | 59.6         | 85.3                     |
| <b>24-48</b>                       | 0.7              | 4.7          | 5.4                      |
| <b>48-72</b>                       | 0.1              | 0.3          | 0.4                      |
| <b>72-168</b>                      | 0.2              | 0.2          | 0.4                      |
| <b>Total</b>                       | 26.6             | 64.8         | 92.4                     |

| <b>Excretion Route<br/>(females)</b> | <b>Urine</b>     | <b>Feces</b> | <b>Total<sup>a</sup></b> |
|--------------------------------------|------------------|--------------|--------------------------|
| <b>Time (h)</b>                      | <b>% of dose</b> |              |                          |
| <b>0-24</b>                          | 33.8             | 54.1         | 87.9                     |
| <b>24-48</b>                         | 0.9              | 4.2          | 5.1                      |
| <b>48-72</b>                         | 0.1              | 0.2          | 0.3                      |
| <b>72-168</b>                        | 0.4              | 0.2          | 0.6                      |
| <b>Total</b>                         | 35.2             | 58.7         | 95.3                     |

<sup>a</sup>includes cage wash.

**Supplementary Table 2.** Percentages (Mean  $\pm$  S.D.) of **urinary** metabolites of PF-04971729 in male and female Sprague Dawley rats after administration of a single 25 mg/kg oral dose of [ $^{14}$ C]-PF-04971729 (N = 3/sex)

| Metabolite            | m/z | $t_R$ (min) | Male Rats      | Female Rats    |
|-----------------------|-----|-------------|----------------|----------------|
| <b>PF-04971729</b>    | 454 | 37.3        | 5.0 $\pm$ 0.3  | 14.4 $\pm$ 3.8 |
| <b>M1</b>             | 470 | 30.4        | 0.9 $\pm$ 0.2  | 0.3 $\pm$ 0.0  |
| <b>M2</b>             | 426 | 28.3        | 12.5 $\pm$ 1.9 | 13.3 $\pm$ 4.2 |
| <b>M5a</b>            | 602 | 21.8        | 0.6 $\pm$ 0.3  | 0.3 $\pm$ 0.2  |
| <b>M6<sup>a</sup></b> | 442 | 21.6        | 6.1 $\pm$ 1.0  | 0.6 $\pm$ 0.2  |
| <b>M7<sup>a</sup></b> | 452 | 38.5        | 0.2 $\pm$ 0.0  | 0.5 $\pm$ 0.0  |
| <b>M8<sup>a</sup></b> | 442 | 25.7        | 0.2 $\pm$ 0.1  | 0.1 $\pm$ 0.1  |
| <b>Total</b>          |     |             | 25.5 $\pm$ 1.1 | 29.5 $\pm$ 1.1 |

<sup>a</sup>M6, M7 and M8 are rat-specific metabolites and derived from oxidation(s) on the ethoxybenzyl-chlorophenyl moiety in PF-04971729.

**Supplementary Table 3.** Percentages (Mean  $\pm$  S.D.) of **fecal** metabolites of PF-04971729 in male and female Sprague Dawley rats after administration of a single 25 mg/kg oral dose of [ $^{14}$ C]-PF-04971729 (N = 3/sex)

| Metabolite            | m/z | $t_R$ (min) | Male Rats      | Female Rats    |
|-----------------------|-----|-------------|----------------|----------------|
| <b>PF-04971729</b>    | 454 | 37.3        | 22 $\pm$ 2.8   | 27 $\pm$ 6.7   |
| <b>M1</b>             | 470 | 30.4        | 5.3 $\pm$ 1.1  | 1.6 $\pm$ 0.2  |
| <b>M2</b>             | 426 | 28.1        | 27.9 $\pm$ 4.6 | 25.5 $\pm$ 2.4 |
| <b>M3</b>             | 470 | 31.7        | 1.2 $\pm$ 1.1  | 0.1 $\pm$ 0.1  |
| <b>M6<sup>a</sup></b> | 442 | 21.3        | 3.0 $\pm$ 0.7  | 0.3 $\pm$ 0.2  |
| <b>M7<sup>a</sup></b> | 452 | 38.5        | 1.4 $\pm$ 0.3  | 1.5 $\pm$ 0.3  |
| <b>M8<sup>a</sup></b> | 442 | 25.3        | 3.2 $\pm$ 1.0  | 1.8 $\pm$ 0.1  |
| <b>M9<sup>a</sup></b> | 470 | 32.6        | 0.4 $\pm$ 0.2  | 0.4 $\pm$ 0.2  |
| <b>Total</b>          |     |             | 65.1 $\pm$ 1.0 | 58.8 $\pm$ 5.1 |

<sup>a</sup>M6, M7, M8 and M9 are rat-specific metabolites and derived from the oxidative metabolism of the parent compound.

**Supplementary Table 4. Circulating** metabolites of PF-04971729 in male and female Sprague Dawley rats after administration of a single 25 mg/kg oral dose of [<sup>14</sup>C]-PF-04971729

| Metabolite             | m/z | t <sub>R</sub> (min) | % of Radioactivity |             | Mean |
|------------------------|-----|----------------------|--------------------|-------------|------|
|                        |     |                      | Male Rats          | Female Rats |      |
| <b>PF-04971729</b>     | 454 | 36.9                 | 86.5               | 94.0        | 90.3 |
| <b>M1</b>              | 470 | 30.3                 | 2.8                | 0.6         | 1.7  |
| <b>M2</b>              | 426 | 28.0                 | 4.2                | 2.3         | 3.3  |
| <b>M4a</b>             | 630 | 29.9                 | 0.7                | 0.3         | 0.5  |
| <b>M4c</b>             | 630 | 33.5                 | 0.7                | 0.3         | 0.5  |
| <b>M5a<sup>b</sup></b> | 602 | 27.6                 | 0.0                | 0.0         | 0.0  |
| <b>M6<sup>a</sup></b>  | 442 | 21.3                 | 2.3                | 0.3         | 1.3  |
| <b>M7<sup>a</sup></b>  | 452 | 38.2                 | 2.8                | 2.3         | 2.6  |

<sup>a</sup>M6 and M7 are rat-specific metabolites and derived from the oxidative metabolism of the parent compound. <sup>b</sup>detected by mass spectrometry.

## II. Dog Mass Balance Summary

**Supplementary Table 5.** Summary of mean radioactivity recovered in male and female Beagle dogs after administration of a single 10 mg/kg oral dose of [<sup>14</sup>C]-PF-04971729 (N = 2/sex)

| <b>Excretion Route<br/>(males)</b> | <b>Urine</b>     | <b>Feces</b> | <b>Total<sup>a</sup></b> |
|------------------------------------|------------------|--------------|--------------------------|
| <b>Time (h)</b>                    | <b>% of dose</b> |              |                          |
| <b>0-24</b>                        | 5.0              | 52.0         | 57                       |
| <b>24-48</b>                       | 1.2              | 24.8         | 26                       |
| <b>48-72</b>                       | 0.3              | 5.30         | 5.6                      |
| <b>72-144</b>                      | 0.2              | 1.40         | 1.6                      |
| <b>Total</b>                       | 6.8              | 83.6         | 92.1                     |

| <b>Excretion Route<br/>(females)</b> | <b>Urine</b>     | <b>Feces</b> | <b>Total<sup>a</sup></b> |
|--------------------------------------|------------------|--------------|--------------------------|
| <b>Time (h)</b>                      | <b>% of dose</b> |              |                          |
| <b>0-24</b>                          | 7.0              | 54.4         | 61.4                     |
| <b>24-48</b>                         | 1.5              | 25.4         | 26.9                     |
| <b>48-72</b>                         | 0.4              | 5.3          | 5.7                      |
| <b>72-96</b>                         | 0.3              | 2.2          | 2.5                      |
| <b>Total</b>                         | 9.2              | 87.4         | 94.8                     |

<sup>a</sup>includes cage wash.

**Supplementary Table 6.** Percentages of **Urinary** metabolites of PF-04971729 in male and female Beagle dogs after administration of a single 10 mg/kg oral dose of [<sup>14</sup>C]-PF-04971729 (N = 2/sex)

| Metabolite            | m/z | t <sub>R</sub> (min) | % of Dose         |                     |
|-----------------------|-----|----------------------|-------------------|---------------------|
|                       |     |                      | Male <sup>a</sup> | Female <sup>a</sup> |
| <b>PF-04971729</b>    | 454 | 36.6                 | 3.7               | 3.2                 |
| <b>M1</b>             | 470 | 30.0                 | 0.7               | 1.3                 |
| <b>M2</b>             | 426 | 27.8                 | 0.5               | 0.6                 |
| <b>M4c</b>            | 630 | 34.4                 | 0.4               | 0.6                 |
| <b>M5a</b>            | 602 | 21.7                 | 0.9               | 1.6                 |
| <b>M6<sup>b</sup></b> | 442 | 21.3                 | 0.1               | 0.7                 |
| <b>M8<sup>b</sup></b> | 618 | 15.6                 | 0.4               | 1.2                 |
| <b>Total</b>          |     |                      | 6.8               | 9.2                 |

<sup>a</sup>Mean data from two dogs. <sup>b</sup>M6 and M8 are not seen in humans.

**Supplementary Table 7.** Percentages of **fecal** metabolites of PF-04971729 in male and female Beagle dogs after administration of a single 10 mg/kg oral dose of [<sup>14</sup>C]-PF-04971729 (N = 2/sex)

| Metabolite         | m/z | t <sub>R</sub> (min) | % of Dose         |                     |
|--------------------|-----|----------------------|-------------------|---------------------|
|                    |     |                      | Male <sup>a</sup> | Female <sup>a</sup> |
| <b>PF-04971729</b> | 454 | 36.4                 | 68.9              | 61.3                |
| <b>M1</b>          | 470 | 29.6                 | 4.8               | 9.5                 |
| <b>M2</b>          | 426 | 27.3                 | 7.7               | 9.8                 |
| <b>M4c</b>         | 630 | 36.0                 | 1.5               | 1.2                 |
| <b>M5a</b>         | 602 | 20.7                 | 0.7               | 3.2                 |
| <b>Total</b>       |     |                      | 83.6              | 85.0                |

<sup>a</sup>mean data from two dogs.

**Supplementary Table 8. Circulating metabolites of PF-04971729 in beagle dogs after administration of a single 10 mg/kg oral dose of [<sup>14</sup>C]-PF-04971729 (N=2/sex)**

|                    |     |                      | % of Radioactivity |                     |
|--------------------|-----|----------------------|--------------------|---------------------|
| Metabolite         | m/z | t <sub>R</sub> (min) | Male <sup>a</sup>  | Female <sup>a</sup> |
| <b>PF-04971729</b> | 454 | 21.6                 | 93.5               | 94.9                |
| <b>M1</b>          | 470 | 29.9                 | 3.27               | 1.8                 |
| <b>M4c</b>         | 630 | 34.4                 | 3.25               | 2.8                 |
| <b>M5a</b>         | 602 | 36.7                 | N.D.               | 0.5                 |
| <b>Total</b>       |     |                      | 100                | 100                 |

<sup>a</sup>mean data from two dogs.

### III. Mass Balance Studies in Bile-duct Cannulated Rats

**Supplementary Table 9.** Summary of mean radioactivity recovered in bile duct cannulated male and female rats (N=2/sex) after administration of a single 25 mg/kg oral dose of [<sup>14</sup>C]-PF-04971729

| Excretion Route<br>(males) | Urine     | Feces | Bile | Total <sup>a</sup> |
|----------------------------|-----------|-------|------|--------------------|
| Time (h)                   | % of dose |       |      |                    |
| <b>0-24</b>                | 33.5      | 9.7   | 45.9 | 89.1               |
| <b>24-48</b>               | 1.1       | 2.0   | 0.9  | 4.0                |
| <b>Total</b>               | 34.6      | 11.7  | 46.8 | 93.7               |

<sup>a</sup>includes cage wash, rinse and cage wipe. Data shown represents the mean from two males.

| Excretion Route<br>(females) | Urine     | Feces | Bile | Total <sup>a</sup> |
|------------------------------|-----------|-------|------|--------------------|
| Time (h)                     | % of dose |       |      |                    |
| <b>0-24</b>                  | 42.3      | 13.0  | 31.7 | 87.0               |
| <b>24-48</b>                 | 1.4       | 1.4   | 0.8  | 3.6                |
| <b>Total</b>                 | 43.8      | 14.4  | 32.5 | 92.3               |

<sup>a</sup>includes cage wash, rinse and cage wipe. Data shown represents the mean from two females.

**Supplementary Table 10.** Percentage of biliary metabolites of PF-04971729 in bile duct cannulated male and female Sprague Dawley rats after administration of a single 25 mg/kg oral dose of [<sup>14</sup>C]-PF-04971729

| Metabolite   | m/z | t <sub>R</sub> (min) | Male Rats | Female Rats |
|--------------|-----|----------------------|-----------|-------------|
| PF-04971729  | 454 | 37.1                 | 1.7       | 3.1         |
| M1           | 470 | 30.6                 | 1.5       | 0.4         |
| M2           | 426 | 28.1                 | 2.0       | 0.1         |
| M4a          | 630 | 29.7                 | 1.6       | 1.2         |
| M4b          | 630 | 31.8                 | 1.8       | 2.4         |
| M4c          | 630 | 35.1                 | 15.8      | 17.3        |
| M5a          | 602 | 21.6                 | 16.3      | 6.3         |
| M5b          | 602 | 27.5                 | 2.7       | 0.5         |
| <b>Total</b> |     |                      | 46.4      | 32.4        |

**Supplementary Table 11.** Percentage of fecal metabolites of PF-04971729 in bile duct cannulated male and female Sprague Dawley rats after administration of a single 25 mg/kg oral dose of [<sup>14</sup>C]-PF-04971729

| Metabolite   | m/z | t <sub>R</sub> (min) | Male Rats | Female Rats |
|--------------|-----|----------------------|-----------|-------------|
| PF-04971729  | 454 | 36.8                 | 71.8      | 85.4        |
| M1           | 470 | 30.2                 | 10.4      | 4.0         |
| M2           | 426 | 27.8                 | 17.5      | 10.2        |
| M7           | 452 | 39.1                 | 0.5       | 0.5         |
| <b>Total</b> |     |                      | 100       | 100         |

#### IV. Mass Balance Studies in Bile-duct Cannulated Dogs

**Supplementary Table 12.** Summary of mean radioactivity recovered in bile duct cannulated male dogs after administration of a single 10 mg/kg oral dose of [<sup>14</sup>C]-PF-04971729

| Excretion route | Urine            | Feces | Bile | Total <sup>a</sup> |
|-----------------|------------------|-------|------|--------------------|
| <b>Time (h)</b> | <b>% of Dose</b> |       |      |                    |
| 0-24            | 7.06             | 21.2  | 63.3 | 91.6               |
| 24-48           | 0.3              | 1.2   | 2.3  | 3.8                |
| <b>Total</b>    | 7.4              | 22.4  | 65.6 | 96.1               |

<sup>a</sup>mean data from two dogs and includes cage wash, rinse and cage wipe.

**Supplementary Table 13.** Percentage of biliary metabolites PF-04971729 in bile-duct cannulated male beagle dogs after administration of a single 10 mg/kg oral dose of [<sup>14</sup>C]-PF-04971729

| Metabolite         | m/z | t <sub>R</sub> (min) | Mean % of dose |
|--------------------|-----|----------------------|----------------|
| <b>PF-04971729</b> | 454 | 36.6                 | 9.6            |
| <b>M1</b>          | 470 | 30.1                 | 3.7            |
| <b>M2</b>          | 426 | 27.7                 | 0.7            |
| <b>M4b</b>         | 630 | 31.4                 | 1.3            |
| <b>M4c</b>         | 630 | 34.3                 | 44.2           |
| <b>M5a</b>         | 602 | 21.7                 | 3.2            |
| <b>Total</b>       |     |                      | 63             |

**Supplementary Table 14.** Percentage of fecal metabolites PF-04971729 in bile-duct cannulated male beagle dogs after administration of a single 10 mg/kg oral dose of [<sup>14</sup>C]-PF-04971729

| Metabolite         | m/z | t <sub>R</sub> (min) | Mean % of dose |
|--------------------|-----|----------------------|----------------|
| <b>PF-04971729</b> | 454 | 36.4                 | 21             |
| <b>M1</b>          | 470 | 29.6                 | 0.7            |
| <b>M2</b>          | 426 | 27.3                 | 0.4            |
| <b>M4c</b>         | 630 | 36.0                 | 0.2            |
| <b>Total</b>       |     |                      | 22.4           |
